# Supplementary material for: Warming assessment of the bottom-up Paris Agreement emissions pledges
Source: PubMed Central journal article supplement (PMC6240108; doi:10.1038/s41467-018-07223-9), 2018-11-16
Supplement: 41467_2018_7223_MOESM3_ESM.pdf [file 41467_2018_7223_MOESM3_ESM.pdf]

## **Description of Additional Supplementary Files**

File Name: Supplementary Data 1

Description: Warming assessment of the bottom-up Paris Agreement emissions pledges
